# Supplementary material
Source: publisher site journal article supplement (https://www.dovepress.com/article/265709)
Supplement: Supplementary file 1 [file get_supplementary_file.php]

**SUPPLEMENTARY MATERIALS**

**An Experimental Analogue Study on the ‘Dose-Response Relationship’ for Exposures to Pain – The more, the better?**

**Authors:**

Karoline Körfer, Lea Schemer, Tobias Kube, & Julia Anna Glombiewski

A

Table A1

*Conducted changes in the study design of the replication*

| Conducted changes | Schemer, Körfer, & Glombiewski, 2019 | Present study design |
| --- | --- | --- |
| Omission of the control condition | Control group | No control group |
| Additional follow-up | No follow-up | Follow-up |
| Exposure goal | Fixed number of exposure trials (3); no predefined exposure goal | Tailored number of exposure trials (3-10); predefined exposure goal (reduction by half) |
| Alignment of instructions | Possibly more cognitive load in the expectation violation condition compared to both other conditions | Alignment of instructions and questions (similar amount of cognitive load) |
| Position of heat stimulation on forearm | Different arms, same spot | Same arm, different spots |
| Threat manipulation | Information about possible side effects  Cover story with ethical committee  Sham measurement of skin thickness  Uncertainty of experimenter | Additionally, referring to the redness of the participant’s skin as a sign of side effects (🡪 strengthening the personal threat beliefs) |
| Order of the manipulation check | Debriefing🡪 manipulation check | Manipulation check 🡪 debriefing |
| Credibility rating and adherence to instructions | At the end of the training | Additional rating after each training trial |

B

## Instructional Sets

- 1. **Definition of Exposure**

What is exposure? **-** Exposure therapy is an approach for overcoming anxiety problems in which people gradually confront feared situations (e.g. places, objects, thoughts, or memories). Purposely facing feared situations is called 'exposure'. For example, if you fear *giving a blood sample*[[1]](#footnote-1) you might *specifically practice this at a blood donation center.* People do exposure exercises during therapy sessions and on their own between sessions.

- 1. **Habituation Rationale**

And how does exposure work? **-** Exposure exercises aim to reduce or eliminate your anxiety and fear. Here's how it works. After doing repeated exposures, your anxiety and fear will habituate - that is, they will gradually decrease each time you face what you fear. By the end of treatment, the situations that currently trigger your anxiety should trigger little anxiety. For example, let's say you fear *giving a blood sample*. At first, when you expose yourself to *giving a blood sample at a blood donation center*, you may feel anxious and scared. But after *donating your blood* again and again, you will start to get used to this experience, or habituate, and your anxiety will gradually decrease. As a result, you will likely feel much less anxious in *other medical* situations, which *require giving a blood sample*.

**Questions to guide in accordance with the therapeutic rational:**

How would you describe the feeling [emotional state] you just had as you perceived the thermal pain?

Please describe that feeling a bit further.

**Prior to each exposure trial:**

Please rate the intensity of your [individual feeling or otherwise: distress*]* **prior to the next trial**?

[0] [10] [20] [30] [40] [50] [60] [70] [80] [90] [100]

neutral very high

**After each exposure trial:**

Please rate the maximum of your [individual feeling; otherwise: distress] **during the past trial**?

[0] [10] [20] [30] [40] [50] [60] [70] [80] [90] [100]

neutral very high

Please rate the intensity of your [individual feeling; otherwise: distress] **after the past trial**?

[0] [10] [20] [30] [40] [50] [60] [70] [80] [90] [100]

neutral very high

**After all exposure trials:**

Please rate the intensity of your anticipated [individual feeling; otherwise: distress] for another trial?

[0] [10] [20] [30] [40] [50] [60] [70] [80] [90] [100]

neutral very high

- 1. **Expectation Violation Rationale**

And how does exposure work? **-** Exposure exercises can help you learn, through your own direct experience, whether feared situations are as dangerous or bad as you believe. Exposure exercises allow you to put your anxious thoughts to the test so you can find out whether the negative outcomes you predict actually occur. If the negative outcomes do occur, you can see whether they are as bad as you expect. For example, if you fear *giving a blood sample*, you can practice *it at a blood donation center* in order to learn how likely it is that the *loss of blood causes dangerous consequences to your health*, and whether the *medical service* reacts *to your potential circulation problems* as negatively as you expect. By conducting exposure exercises to test your negative predictions, you can learn that feared situations are not as dangerous or bad as you once believed them to be.

**Questions to guide in accordance with the therapeutic rational:**

What would be the worst to happen?

**Prior to each exposure trial:**

How likely do you think it is, that you will experience [individual feared outcome] during the next trial?

[0] [10] [20] [30] [40] [50] [60] [70] [80] [90] [100]

unlikely very likely

**After each exposure trial:**

Did you experience [individual feared outcome]?

[0] [10] [20] [30] [40] [50] [60] [70] [80] [90] [100]

Not at all as expected/

worse than expected

How do you know? / How did it feel?

If [individual feared outcome] has happened: Was it as bad as expected?

[0] [10] [20] [30] [40] [50] [60] [70] [80] [90] [100]

less bad worse

**After all exposure trials:**

How likely do you think it is, that you will experience [individual feared outcome] during another trial?

[0] [10] [20] [30] [40] [50] [60] [70] [80] [90] [100]

unlikely very likely

**References**

Arch JJ, Twohig MP, Deacon BJ, Landy LN, Bluett EJ. The credibility of exposure therapy: Does the theoretical rationale matter? *Behav Res Ther*. 2015;72:81-92. doi:10.1016/j.brat.2015.05.008

Schemer L, Körfer K, Glombiewski JA. Evaluation of Exposure Instructions to Pain: Should Therapist Focus on Fear Reduction or Expectation Violation? *Cognit Ther Res*. 2019;44(3):697-708. doi:10.1007/s10608-019-10070-7

1. *changes compared to Arch et al., 2015 marked in italics*  [↑](#footnote-ref-1)
